# Supplementary material for: Multi-proteomic Analysis Revealed Distinct Protein Profiles in Cerebrospinal Fluid of Patients Between Anti-NMDAR Encephalitis NORSE and Cryptogenic NORSE
Source: Research Square preprint supplement (doi:10.21203/rs.3.rs-1029260/v1), 2021-11-02
Supplement: Supplementary file 1 [file 24671d76446fb3d387cf864d.xlsx]

## Sheet: NMDAR vs Control
Proteins (LFQ value)	Fold change	P value	Control					NMDAR						C-NORSE
			C1	C2	C3	C4	C5	R1	R2	R3	R4	R5	R6	E1	E2	E3	E4	E5
IGLV4-60	111.405	0.0349688		0.039174		0.008331					6.70522	0.632766	0.600452		0.005144	0.003895		0.005022
IGHV2-70D	44.8762	0.0161284	0.01903	0.004326	0.0068	0.2211	0.003142	0.088711	0.468755	0.030523	0.223987	5.55633	7.33138	0.028663		0.005453		0.011799
IGLV3-25	24.2649	0.00764854	0.08314	0.079826	0.064162	0.139351	0.137013	0.155977	1.01807	0.496651	3.25117	9.31846	0.420271	0.14278	0.091196	0.0734	0.184431	0.344105
HLA-B	23.6303	3.74653e-05		0.063733	0.052791		0.056195		0.887176	0.754746	1.20226	1.41607	2.54209			0.588458	2.94459	0.491898
HIST2H2AC	14.9913	0.00186405	0.176279	0.098856	0.019942	0.185521	0.132823	0.313821	0.49345	1.00304	3.04126	2.45736	3.72621			0.88411	0.634983	0.832347
CD74	10.365	0.00574737		0.37618	0.081904	0.126386			0.73425		2.97026	1.97449	2.39834	0.096565		0.47181	1.29412	0.475696
IGLV3-27	9.2652	0.0383285	0.304165	0.131127	0.14433	0.297039	0.325607	0.245794	0.82713	0.192225	2.56334	5.43755	4.1011	0.239279	0.222284	0.25081	0.288178	0.430045
ADCYAP1	7.8661	0.0472958	0.352774	0.019009					1.23548	0.566962	1.57561	0.429542	3.50364			0.016988	0.48407	1.81593
H3F3A	7.2454	0.00477262	0.346346	0.123423	0.070903	0.347778	0.491206	0.51019	0.576218	1.23973	2.7032	3.01052	3.95546	0.026244	0.032251	0.802364	0.880504	0.883669
HIST1H1E	7.103	0.00163624	0.169269	0.186201	0.084701	0.659024	0.301746	0.66744	0.844683	1.13818	2.52759	2.80892	3.95431	0.081623	0.060685	0.91829	0.591631	1.00571
HIST1H4A	7.0906	0.00841945	0.250723	0.120419	0.152313	0.474312	0.345105	0.34421	0.660207	0.649633	2.761	2.67454	4.33653	0.049575	0.066132	1.24878	0.819734	1.04678
HIST1H1B	5.6534	0.0345221	0.108261			0.466179	0.236513		0.474526	0.447743	2.0605	1.90925	2.74904			1.27924	0.7869	0.481847
ST8SIA5	5.2108	0.0310845	0.266606	0.407599	0.561082	0.140071	0.226258	1.97141	0.332273	3.35173	0.268169	1.2244	2.86682	0.732422	1.75448	0.168775	1.49403	0.233885
IGKV1-39	4.5988	0.0376612	0.21443	0.238872	0.19301	0.75652	0.501703	0.461486	0.800252	0.397102	1.17816	5.38963	2.28356	0.309655	0.700366	0.208818	0.872315	1.49412
IGLV3-19	4.1491	0.0130837	0.453662	0.15336	0.234539	0.818973	0.281704	0.631422	0.473334	0.972347	3.72954	1.89537	1.96825	0.393832	0.446677	0.284238	0.603632	2.65912
PDYN	4.0717	0.0269012	0.024228	0.081845	0.392644	0.098794	0.133039	0.15094	0.177061	0.827786	0.447939	0.550696	1.41507		0.318924	0.809751	3.59077	5.98052
EVL	3.9223	0.00352953	0.410842	0.374675	0.239159	0.580819	0.210987	0.767789	1.33514	0.510804	1.61075	1.23886	3.08645	0.571038	0.086542	2.76939	0.917268	1.28948
CECR1	3.8677	0.0128144	0.651075	0.423317	0.531163	0.368685	0.103551	0.487249	1.09861	0.780435	1.92955	2.55981	2.78798	0.278329	0.371505	0.918487	1.929	0.781239
IGHV4-31	3.8357	0.0125845	0.570594	0.304653	0.356498	0.760075	0.38466	0.91755	0.794641	0.71128	2.82674	4.45022	1.23826	0.535069	0.101403	0.576373	0.335984	1.13601
CAP1	3.8348	0.00907295	0.383686	0.385276	0.566163	0.310011	0.481065	0.728181	0.615053	1.03365	0.996688	2.69342	3.71719	0.124352	0.454298	1.53883	1.22377	0.748369
HLA-A	3.8297	0.0113809	0.781996	0.660543	0.292117	0.103785	0.11457	0.43655	1.4405	1.07363	1.32557	3.07291	1.62617	0.086078	0.340854	1.76752	1.90877	0.968442
CD84	3.5919	0.0262842	0.693814	0.489277	0.672276	0.064923	0.329825	0.600147	0.932573	0.712254	2.04021	1.79571	3.61766	0.227281	0.413279	0.425044	1.47022	1.5155
SCG2	3.5691	0.0218368	0.606734	0.241963	0.761603	0.24061	0.120903	0.435318	0.84153	1.16351	1.22584	0.844401	3.93443	0.065852	0.46939	0.274394	1.40162	3.3719
PLD4	3.4512	0.0214592	0.260617	0.486146	1.21159	0.181162	0.06895	0.456462	1.51708	0.669758	2.3281	1.42057	2.75427	0.697924	1.18249	0.315339	0.957254	1.49228
GALNT1	3.1896	0.0328599	0.593412	0.452845	0.916306	0.231013	0.169983	0.374183	0.872788	2.18106	2.21326	0.779279	2.626		0.797735	0.399662	0.741057	1.65141
CRHBP	3.1769	0.0417363	0.061892	0.41273	0.186563			0.357373	0.443804	0.525893	0.398066	1.7625	0.713359			2.69626	4.27435	0.167205
NCL	3.1635	0.0437712	0.742831	0.381462	0.734706					2.13024	1.37546	0.863184	3.47242	0.101935	0.326519	0.085968	1.18652	0.598763
CAPZA1	3.1631	0.0369875	0.215836	0.402179	0.695327	0.407455	0.429147	0.531724	0.396944	0.797347	1.35484	1.93411	3.14557	0.115453	0.052622	2.56608	1.49224	1.46314
PILRA	3.0802	0.0483645	0.613503		0.186509	0.39982			0.522498		1.22663	1.22222	1.95623			0.36585	0.450728	3.05601
GANAB	3.0525	0.00224376	0.271058	0.659582	0.565509	0.256614	0.654057	1.10724	0.703564	2.00626	1.34355	2.19466	1.461	0.420206	1.13792	0.819902	1.76285	0.636033
FXYD6	3.0334	0.00995501	0.182845	0.767579	0.25768	0.687919	0.362191	1.31244	1.14467	1.37584	1.55041	1.44826	1.38833		1.32671		1.62369	0.57144
VGF	2.7856	0.0215785	0.8503	0.29608	0.671495	0.230117	0.117589	0.537357	1.06173	1.5063	0.971182	0.6839	2.47836	0.114827	0.695671	0.387739	1.25159	4.14577
IGLV1-51	2.7736	0.0377655	0.871129	0.35212	0.503593	1.01797	0.356621	1.40232	0.539096	0.897626	1.39379	1.79003	4.29979	0.335939	0.594972	0.450888	0.341598	0.852505
IGKV1-17	2.7405	0.018804	0.546619	0.521379	0.484003	0.935666	0.514314	0.681708	0.675655	1.12554	2.22986	2.31706	2.84253	0.42954	0.445782	0.712411	0.601099	0.936833
MYL12B	2.7361	0.0240107	0.377838		0.428176	0.848719					1.07736	1.69235	1.7578			1.06493	0.891322	0.861504
IL6R	2.6795	0.0200008	0.227245	0.767618	1.1705	0.255817	0.092644	0.729474	0.938598	0.926715	1.54857	2.32321	1.61649	0.688906	0.631189	0.264657	2.50861	1.30976
SECTM1	2.4699	0.0406671	0.077591	0.402756	0.484357	0.761297	0.324842	0.398658	0.843634	0.672353	1.03932	1.95518	1.16941	0.264843	0.383259	2.69809	3.48644	1.03798
FAM20B	2.4572	0.0338982	0.212538	0.610238	0.954147	0.330034		0.991871	0.758379	1.61263	0.972932	0.726221	2.70375		1.72818	0.31633	1.79909	0.28366
PENK	2.4511	0.00267729	0.683575	0.359877	0.852359	0.431435	0.218592	0.945506	1.3626	1.72341	1.01238	1.07785	1.36624	0.170546	0.679379	0.501948	2.09531	2.51899
SEMA3G	2.4434	0.0359545	0.490915	0.632024	0.926742	0.542818	0.125896	0.691317	1.17239	0.605237	1.66361	1.40723	2.43083	0.374836	0.981779	0.583225	1.81906	1.55209
ERAP2	2.4068	0.0261569	1.08249	0.759979	0.317659	0.060378	0.406977	1.43701	1.16077	1.51073	1.04586	0.909447	1.52473	0.573848	0.94642	1.56568	1.58615	1.11187
SH3BGRL	2.3669	0.0229314	0.378862	0.576582	0.515477						0.97868		1.34232			1.18684	1.54863	1.4726
PLAUR	2.3611	0.0210643	0.4359	1.01523	0.426184	0.501119	0.621089				1.26446		1.56842			1.41996	0.791167	1.95648
PCSK9	2.2425	0.0131479	0.600567	0.627442	0.638556	0.762333	0.363603	0.584069	1.34673	2.34791	1.26574	0.919527	1.58892	0.067509	1.9356	0.919072	1.46176	0.570675
CHGB	2.2132	0.0231001	0.828889	0.532851	1.12226	0.439103	0.333421	1.11229	1.09031	1.72362	1.20933	0.702977	2.81019	0.17188	1.4521	0.602202	1.15576	0.712816
ICAM1	2.2038	0.00304169	0.734282	0.506939	0.465964	0.590086			1.27655		0.858504	1.57459	1.35316	0.749906	0.4947	1.04798	2.08052	1.26682
NSG1	2.1997	0.0146502	0.725665	0.656466	0.940859	0.482859	0.321974	1.25278	0.826744	1.61668	1.16508	0.830199	2.56503	0.405062	1.79784	0.662328	0.916913	0.833527
HIST1H1C	2.1749	0.00951772	0.644466	0.73199	0.555042	0.626382		1.13688	0.608455	1.62891	1.67791	1.49277	1.79982			0.688757	0.898436	0.510177
IGFBP7	2.1458	0.00417891	0.673149	0.855249	0.863809	0.328985	0.267488	1.33983	1.1613	1.25595	1.28381	1.53283	1.12206	0.363263	1.25841	1.03218	2.01357	0.648134
DSG2	2.1218	0.0028061	1.08568	0.637578	0.607072	0.347264	0.600625	1.28978	1.43451	1.21773	0.935459	1.618	1.85122	0.184755	1.35322	0.729568	1.44948	0.658056
PRDX4	2.0919	0.0277163	0.546449	0.739676	0.829198		0.659164	0.799838	0.815215	0.904095	1.93437	1.5515	2.70104	0.271131	0.861483	1.0442	0.799162	0.543472
GRN	2.0444	0.0348744	0.700806	0.49577	0.831041	0.478456	0.353409	0.867593	1.45816	0.440888	0.96134	1.72667	1.56031	0.39711	0.715251	1.50044	2.36538	1.14738
CD82	2.0039	0.00651961	0.501169	0.576529	0.482339			0.818586	0.711749		1.14368	1.30032	1.23599	0.604394	0.998207	1.53706	2.08997
CHMP4A	1.9071	0.0133131	0.507898	0.403583	0.945432	0.915914	0.561661	1.31894	1.00438			1.59803	1.1661		0.995191		1.58286
F5	1.8786	0.022444	0.508844	1.50741	0.572711	0.265596	0.284359	1.01856	1.3522	1.11008	0.794292	1.37406	1.42707	0.266054	1.43457	1.47322	1.94903	0.661944
PRSS1	1.747	0.037008	1.50648	0.576973	0.747892	0.638694	0.278828	1.973	0.885446	1.15989	1.10142	1.25317	1.48609		0.919902	0.981974	0.976849	0.513385
PLOD1	1.7312	0.0279037	0.704648	0.689492	0.82881	0.394355	0.657044	0.807437	0.861636	1.52523	1.14848	1.74446	0.714859	0.261455	0.641168	1.34909	2.22611	1.44574
GOLM1	1.7307	0.0228497	0.975194	0.674312	0.950717	0.437058	0.347097	0.81932	0.93448	1.26527	1.30081	1.04112	1.6678	0.199907	0.977494	0.965165	1.94735	1.4969
TTR	1.7015	0.0191275	1.04411	1.00558	0.796212	0.319352	0.497158	1.39445	1.05552	1.56015	1.208	1.09414	1.16566	0.551686	1.23467	1.04661	1.51568	0.511026
C1QTNF4	1.6976	0.0189336	0.724136	0.61966				1.02467		1.0824			1.31475				1.23438
ENPP2	1.6888	0.00622896	0.752173	0.885776	0.962674	0.57647	0.40626	1.3268	1.24995	1.07857	1.09819	1.51056	0.99773	0.457398	1.24434	1.12256	1.72538	0.605173
APOE	1.6289	0.0325294	1.20022	0.819073	1.03846	0.44348	0.344263	1.32718	1.12301	1.62032	1.11513	1.02134	1.30966	0.584689	1.11901	0.588749	1.13978	1.20562
IGHV4-34	1.6207	0.0286028	0.931821	0.614375	0.584125	0.887502	0.994749	1.07715	0.709227	1.8257	1.51528	1.39897	1.27728	0.975658	1.14276	0.628992	0.484993	0.95142
KNG1	0.6527	0.041264	0.995161	1.0963	0.944184	1.91165	1.20097	0.707326	1.41361	0.578494	0.60781	0.815238	0.693344	1.28299	0.842405	0.909086	0.725378	1.27605
CFH	0.648	0.0158444	0.988019	1.25293	1.16607	1.67553	0.922903	0.67975	0.860766	0.483289	0.861416	0.823836	0.960624	0.966037	1.03614	0.742449	1.25715	1.32308
MTRF1	0.6431	0.0115614	1.20144	0.908128	1.09486	1.39071	1.15982	1.07485	0.89381	0.462626	0.628155	0.757569	0.624549	0.99316	1.27906	1.51353	1.03312	0.984604
NGFR	0.6345	0.0400838		1.31068	1.55392			0.626553	0.755287	1.00632	0.827731	1.19693	1.04019		0.944989	0.618078	0.810127	1.30919
ZC4H2	0.6339	0.0338442	1.26742	0.786905	1.11303	1.62765	1.68517	0.937909	1.00364	0.968637	0.650385	0.487536	0.880887	1.51606	1.08856	0.456751	0.641516	0.887945
MGP	0.6337	0.0386849	0.792103	1.34095	0.941686	0.693432	0.949328	0.345214	0.757969	0.615662	0.391079	0.497994	0.979435	0.296668	0.513909	1.75229	3.60692	1.52536
KRT81	0.6317	0.0291185	0.773952	1.07413	1.37803	1.32244	1.8342	1.12794	0.790202	0.905456	0.71098	0.772438	0.531673	0.76826	1.39191	1.13186	0.759051	0.727485
EPB42	0.6266	0.0450423	1.25291	1.07637	1.19929	1.09387	2.06489	0.850581	0.892864	0.385514	1.1089	1.15102	0.639379	0.541989	0.90964	0.809707	1.00208	1.02099
MMRN2	0.6158	0.0447235	0.943156	1.01415	1.62801	1.09599	1.20141	0.476601	0.837128	0.290033	0.754921	0.892645	1.09603	0.965596	1.05741	1.22918	1.09515	1.42258
APOA2	0.6138	0.025915	1.01043	0.999121	1.31997	1.60737	1.64467	1.10006	1.32082	0.609545	0.48449	0.701691	0.630722	1.40896	0.961256	0.867689	0.61848	0.714716
FBN1	0.5774	0.0310184	0.815854	1.03102	2.03854	0.944135	1.34149	0.580402	0.595304	0.707852	0.512955	0.534462	1.34472	0.785067	0.908302	0.958085	1.81741	1.0844
LTF	0.5692	0.0293759	0.950717	0.902755	1.59024	0.990942	2.17349	0.896319	0.765154	0.529333	1.06438	0.774683	0.484001	0.378673	1.27639	1.39158	1.27678	0.55456
PLCB3	0.5648	0.00863907	0.816007		1.00825	1.26156	1.63316	0.830324	0.693129		0.56665	0.589378	0.65234	1.80519	1.17614	1.3174	0.782329	0.868148
AHSG	0.5606	0.0437803	0.56619	1.00815	1.24813	1.51295	2.13909	0.812781	0.822512	0.622397	0.763492	0.771488	0.562515	1.28899	1.20366	1.07646	0.736357	0.864825
PLS3	0.5576	0.00862722	1.12086	0.622226	0.785017	0.673299	0.7705		0.449318	0.422827	0.430992	0.265231	0.646541	0.4197	0.384329	5.41037	0.995339	1.60345
S100A8	0.5159	0.0313838	1.00933	0.626903	0.875409	1.32233	2.44624	0.723056	0.629301	0.671469	0.795201	0.588323	0.480683	1.65965	0.274615	1.74329	1.17323	0.980973
SLITRK4	0.5083	0.0100349	1.21758	1.27341	2.09916			0.903518	0.66911	0.666849	0.635935		1.01307		0.934059	0.583757	1.29098	0.71258
HRG	0.4798	0.00490113	1.01418	1.02348	1.37419	1.7031	2.12935	0.66893	1.13411	0.738433	0.428491	0.695208	0.505565	1.14027	0.920691	0.526176	0.792332	1.20548
B3GAT1	0.4558	0.0112443	0.934608	0.858941	1.1664	1.87353	2.61185	0.649533	0.961026	0.606167	0.435994	0.803529	0.615797	1.46609	0.855302	0.546972	0.834191	0.78008
SPTAN1	0.4329	0.011059	0.645342	0.658055	0.55965	0.544332	1.63919	0.209778	0.514605	0.299896	0.286822	0.262643	0.528395	0.456802	0.595257	5.86202	0.748937	2.18827
YWHAG	0.4272	0.0212887	0.689923	0.207025	0.647118	0.203866	0.375068	0.122966	0.154533	0.186237	0.14821	0.270953	0.205414	0.06086	0.185109	4.71169	4.00969	3.82134
CTGF	0.4231	0.0418853	2.0699	1.3823	1.39735	0.735338		0.30565	0.218136		0.653347	0.431663	1.34525	0.445454	0.336213	0.795121	2.19096	1.69332
DNER	0.4149	0.01451	1.1972				1.90509	0.698113	0.580115			0.798066	0.498145		0.928323	0.678629	1.60938	1.10694
SLC12A5	0.3435	0.0148622	0.711797		0.75036					0.219457	0.195457		0.338487			4.19862	1.18006	0.405758
AQP4	0.3432	0.0107354	0.940383	1.14508	1.70224	0.890194	3.23885		0.573847	0.479162	0.528222		0.592185	0.653229	0.30881		1.00249	0.945315
RBBP9	0.3094	0.0175127			1.93238	1.5175					0.713418	0.507144	0.380305			0.86448	1.41911	0.665665
LINGO1	0.2951	0.0389982	0.755402	1.13023	2.93566			0.681065	0.521901	0.504421	0.163909	0.1872	0.786892		1.34871	0.455746	2.46565	1.06322
FGA	0.295	0.0224941	0.62584	0.825636	0.475894	3.3472	2.10098	0.320896	0.578283	0.485709	0.363011	0.485158	0.377903	0.891744	0.345852	1.49554	0.637352	2.64301
FGG	0.2556	0.0400914	0.671424	0.81173	0.520741	3.14274	2.58857	0.359533	0.365907	0.440725	0.378751	0.430887	0.396554	0.739557	0.43956	1.43019	0.671122	2.61201
MAPK1	0.2478	0.0129913	1.49049	0.706409	1.38563		3.21638	0.210051	0.766502	0.147637	0.151725	0.266005	0.984818	0.856051	0.691426	2.01631	1.79633	0.314233
FGB	0.2455	0.046015	0.634328	0.767241	0.448677	3.04233	2.64187	0.320271	0.332691	0.391473	0.383198	0.401183	0.391009	0.912228	0.428552	1.56896	0.667646	2.66835
GLUL	0.194	0.0112149	0.791113	0.721907	2.5065	0.683559	5.85385	0.387901	0.400302	0.58062	0.33712	0.364387	0.387872	0.670946	0.307296	0.965699	0.465568	0.57536
GP1BA	0.1723	0.0120841	0.45998	0.606513	1.01193	4.34178	3.82215	0.307486	0.520943	0.207345	0.447147	0.335774	0.299541	1.42047	0.230962	0.706047	0.544228	0.737705
PIP	0.1719	0.0432918		5.62189	1.92529	0.407924		0.266519	0.369126	0.422575	0.610807	0.373949	0.691346		0.173919	0.645206	0.491445
CKB	0.1689	0.0194876	0.334754	0.264899	1.87655		0.705197	0.032008	0.024142	0.171564	0.268611	0.103362	0.206503		0.171824	7.63395	1.5422	0.664444
SERPINE1	0.1444	0.00384121	1.07381	1.21002	0.846078		2.78345	0.058999	0.042094	0.264163	0.12281	0.388814	0.404227			1.63216	3.6321	0.541285
CTSG	0.0991	0.00623953	0.06118			0.347544	0.352702		0.017587	0.04121	0.0364	0.018225	0.012378		6.30153	0.358854	4.43289	0.019504
DDAH1	0.0775	0.0173951	0.792134	0.092331	2.95098		2.28854	0.050566	0.045499	0.438146	0.072245	0.014838	0.090746		0.092626	2.67289	1.41077	2.98769
